# Supplementary material for: Plasticity of olfactory bulb inputs mediated by dendritic NMDA-spikes in rodent piriform cortex
Source: eLife. 2021 Oct 26;10:e70383. doi: 10.7554/eLife.70383 (PMC8575458; doi:10.7554/eLife.70383)
Supplement: Figure 1—figure supplement 1—source data 1. [file elife-70383-fig1-figsupp1-data1.xlsx]

## Sheet: Sheet1
Panel C												Panel D
Control EPSP				Post STDP				Post NMDA-spike				Average EPSP of each cell
Amplitude	Time	Average		Amplitude	Time	Average		Amplitude	Time	Average		Control	Post STDP
0.783	0.5	1.15		1.263	20	1.12		3.88648	50	4.16		1.488	1.601
0.721	1	1.15		1.172	20.5	1.12		4.85677	50.5	4.16		1.09	1.199
1.081	1.5	1.15		1.434	21	1.12		3.65235	51	4.16		1.15	1.12
0.636	2	1.15		1.245	21.5	1.12		4.18829	51.5	4.16
0.702	2.5	1.15		0.291	22	1.12		4.11123	52	4.16
0.989	3	1.15		0.385	22.5	1.12		3.78752	52.5	4.16
0.679	3.5	1.15		1.233	23	1.12		3.8274	53	4.16
1.385	4	1.15		1.991	23.5	1.12		3.98155	53.5	4.16
1.551	4.5	1.15		0.317	24	1.12		4.51243	54	4.16
1.862	5	1.15		0.543	24.5	1.12		4.53611	54.5	4.16
1.583	5.5	1.15		0.475	25	1.12		3.89162	55	4.16
1.385	6	1.15		1.661	25.5	1.12		3.28352	55.5	4.16
1.561	6.5	1.15		1.923	26	1.12		4.65642	56	4.16
1.855	7	1.15		1.154	26.5	1.12		3.7583	56.5	4.16
1.533	7.5	1.15		0.981	27	1.12		3.19976	57	4.16
0.696	8	1.15		0.702	27.5	1.12		0.446	57.5	4.16
0.711	8.5	1.15		1.044	28	1.12		3.96372	58	4.16
1.605	9	1.15		1.898	28.5	1.12		3.65467	58.5	4.16
0.671	9.5	1.15		1.411	29	1.12		3.63991	59	4.16
1.096	10	1.15		0.854	29.5	1.12		3.08684	59.5	4.16
				0.586	30	1.12		4.32675	60	4.16
				1.215	30.5	1.12		4.91935	60.5	4.16
				0.996	31	1.12		4.76477	61	4.16
				1.373	31.5	1.12		3.45992	61.5	4.16
				0.623	32	1.12		4.5069	62	4.16
				2.611	32.5	1.12		3.50967	62.5	4.16
				0.801	33	1.12		4.52429	63	4.16
				0.507	33.5	1.12		3.99075	63.5	4.16
				1.062	34	1.12		4.29155	64	4.16
				0.629	34.5	1.12		4.03774	64.5	4.16
				0.941	35	1.12		3.75131	65	4.16
				0.958	35.5	1.12		4.00169	65.5	4.16
				1.282	36	1.12		4.8867	66	4.16
				0.684	36.5	1.12		4.45283	66.5	4.16
				1.135	37	1.12		3.9962	67	4.16
				1.178	37.5	1.12		3.36867	67.5	4.16
				1.001	38	1.12		4.23954	68	4.16
				1.526	38.5	1.12		4.85941	68.5	4.16
				1.129	39	1.12		4.64937	69	4.16
				1.038	39.5	1.12		3.90229	69.5	4.16
				1.031	40	1.12		4.35597	70	4.16
				2.621	40.5	1.12		5.25352	70.5	4.16
				1.373	41	1.12		4.90845	71	4.16
				1.454	41.5	1.12		3.76439	71.5	4.16
				0.684	42	1.12		4.97269	72	4.16
				1.111	42.5	1.12		5.07445	72.5	4.16
								3.98067	73	4.16
								4.1968	73.5	4.16
								4.16868	74	4.16
								4.29518	74.5	4.16
								4.7441	75	4.16
								4.0773	75.5	4.16
								4.38971	76	4.16
								4.90787	76.5	4.16
								4.90178	77	4.16
								4.5377	77.5	4.16
								4.66151	78	4.16
								4.13502	78.5	4.16
								4.30413	79	4.16
								4.60963	79.5	4.16
								4.24492	80	4.16
								4.30509	80.5	4.16
