# Supplementary material for: Plasticity of olfactory bulb inputs mediated by dendritic NMDA-spikes in rodent piriform cortex
Source: eLife. 2021 Oct 26;10:e70383. doi: 10.7554/eLife.70383 (PMC8575458; doi:10.7554/eLife.70383)
Supplement: Figure 1—source data 1. [file elife-70383-fig1-data1.xlsx]

## Sheet: Sheet1
Figure 1C								Figure 1D			Figure 1F								Figure 1G
Control EPSP				Post STDP_EPSP				Average EPSP of each cell			Control EPSP				Post STDP_EPSP				Average EPSP of each cell
Amplitude	Time	Average		Amplitude	Time	Average		Control	Post STDP		Amplitude	Time	Average		Amplitude	Time	Average		Control	Post STDP
0.761238	0	0.76		0.646304	22	0.747		0.465	0.464		1.001	0.5	0.593		1.85312	25	1.142		0.435	0.675
0.941	0.5	0.76		0.708	22.5	0.747		0.641	0.647		0.262	1	0.593		0.836	25.5	1.142		0.935	1.424
0.641	1	0.76		0.888567	23	0.747		0.754	0.737		0.995	1.5	0.593		2.118	26	1.142		0.883	1.53
0.684	1.5	0.76		0.799	23.5	0.747		0.731	0.722		0.339	2	0.593		1.271	26.5	1.142		0.582	0.927
0.829	2	0.76		1.074	24	0.747		0.72	0.648		0.281	2.5	0.593		0.861	27	1.142		0.593	1.142
0.397	2.5	0.76		0.635	24.5	0.747		0.76	0.747		0.488	3	0.593		1.331	27.5	1.142		0.84	1.52
1.318	3	0.76		0.922	25	0.747		0.66	0.81		0.555	3.5	0.593		0.702	28	1.142
1.135	3.5	0.76		0.555	25.5	0.747		0.78	0.79		0.745	4	0.593		1.263	28.5	1.142
0.854	4	0.76		0.848	26	0.747		0.45	0.53		0.452	4.5	0.593		0.659	29	1.142
0.977	4.5	0.76		0.545	26.5	0.747		0.557	0.587		0.696	5	0.593		1.825	29.5	1.142
0.469	5	0.76		0.574	27	0.747		0.522	0.527		0.482	5.5	0.593		2.803	30	1.142
0.836	5.5	0.76		0.471	27.5	0.747					0.361	6	0.593		1.133	30.5	1.142
0.665	6	0.76		0.897	28	0.747					0.747	6.5	0.593		1.019	31	1.142
0.754	6.5	0.76		0.753798	28.5	0.747					0.553	7	0.593		0.909	31.5	1.142
0.964	7	0.76		0.934	29	0.747					0.557	7.5	0.593		1.093	32	1.142
0.684	7.5	0.76		0.537	29.5	0.747					0.702	8	0.593		1.161	32.5	1.142
0.592	8	0.76		0.531	30	0.747					1.10316	8.5	0.593		1.538	33	1.142
0.623	8.5	0.76		1.093	30.5	0.747					0.555	9	0.593		0.909	33.5	1.142
0.579	9	0.76		0.543	31	0.747					0.494	9.5	0.593		0.721	34	1.142
0.823	9.5	0.76		0.604	31.5	0.747					0.373179	10	0.593		0.691	34.5	1.142
0.525	10	0.76		0.559	32	0.747					0.647	10.5	0.593		1.271	35	1.142
0.464	10.5	0.76		1.105	32.5	0.747					0.385	11	0.593		1.147	35.5	1.142
0.977	11	0.76		0.415	33	0.747					0.563	11.5	0.593		0.972	36	1.142
0.751	11.5	0.76		0.787	33.5	0.747					0.773	12	0.593		0.955451	36.5	1.142
0.641	12	0.76		0.659	34	0.747					0.387	12.5	0.593		0.781	37	1.142
0.652	12.5	0.76		1.312	34.5	0.747					0.703	13	0.593		0.719	37.5	1.142
1.013	13	0.76		0.684	35	0.747					0.684	13.5	0.593		1.441	38	1.142
0.897	13.5	0.76		0.922	35.5	0.747					0.613716	14	0.593		0.651	38.5	1.142
0.493	14	0.76		0.641	36	0.747					0.721	14.5	0.593		0.842	39	1.142
0.964	14.5	0.76		0.629	36.5	0.747					0.559429	15	0.593		1.617	39.5	1.142
0.673	15	0.76		0.781	37	0.747									0.931	40	1.142
				0.629	37.5	0.747									1.721	40.5	1.142
				0.896	38	0.747									0.789	41	1.142
				0.531	38.5	0.747									1.459	41.5	1.142
				0.775	39	0.747									0.745	42	1.142
				0.684	39.5	0.747									0.879	42.5	1.142
				0.885	40	0.747									0.579	43	1.142
				1.062	40.5	0.747									1.013	43.5	1.142
				0.613	41	0.747									1.135	44	1.142
															0.909	44.5	1.142
															1.648	45	1.142
															1.068	45.5	1.142
															1.154	46	1.142
