# Supplementary material for: Plasticity of olfactory bulb inputs mediated by dendritic NMDA-spikes in rodent piriform cortex
Source: eLife. 2021 Oct 26;10:e70383. doi: 10.7554/eLife.70383 (PMC8575458; doi:10.7554/eLife.70383)
Supplement: Figure 2—source data 1. [file elife-70383-fig2-data1.xlsx]

## Sheet: Sheet1
Figure 2B								Figure 2D
Control EPSP				Post STDP_EPSP				Average EPSP of each cell
Amplitude	Time	Average		Amplitude	Time	Average		Control	Post STDP
1.921	0	1.58		2.894	24	2.36		0.65	0.997
2.521	0.5	1.58		4.078	24.5	2.36		1.76	1.78
1.404	1	1.58		3.309	25	2.36		1.69	2.54
1.807	1.5	1.58		1.187	25.5	2.36		1.58	2.36
1.703	2	1.58		3.778	26	2.36		0.69	0.91
2.197	2.5	1.58		1.361	26.5	2.36		0.733	1.04
1.697	3	1.58		1.936	27	2.36		3.18	4.007
2.338	3.5	1.58		1.532	27.5	2.36		1.21	1.73
0.979	4	1.58		2.418	28	2.36
1.849	4.5	1.58		3.607	28.5	2.36
1.544	5	1.58		1.961	29	2.36
1.459	5.5	1.58		1.661	29.5	2.36
1.771	6	1.58		0.622	30	2.36
0.885	6.5	1.58		0.938	30.5	2.36
0.529	7	1.58		4.258	31	2.36
0.494	7.5	1.58		3.392	31.5	2.36
1.551	8	1.58		1.521	32	2.36
2.362	8.5	1.58		2.381	32.5	2.36
2.039	9	1.58		1.764	33	2.36
2.472	9.5	1.58		1.458	33.5	2.36
1.331	10	1.58		1.294	34	2.36
2.014	10.5	1.58		0.909	34.5	2.36
1.703	11	1.58		1.239	35	2.36
1.404	11.5	1.58		1.357	35.5	2.36
2.016	12	1.58		3.247	36	2.36
1.699	12.5	1.58		1.955	36.5	2.36
0.671	13	1.58		1.971	37	2.36
1.094	13.5	1.58		1.855	37.5	2.36
0.958	14	1.58		2.661	38	2.36
1.038	14.5	1.58		3.058	38.5	2.36
1.492	15	1.58		2.091	39	2.36
				2.625	39.5	2.36
				2.451	40	2.36
				3.186	40.5	2.36
				0.842	41	2.36
				1.271	41.5	2.36
				3.418	42	2.36
				1.599	42.5	2.36
				3.816	43	2.36
				2.576	43.5	2.36
				2.698	44	2.36
				2.667	44.5	2.36
				4.175	45	2.36
				1.031	45.5	2.36
				2.386	46	2.36
				3.302	46.5	2.36
				1.526	47	2.36
				2.618	47.5	2.36
				3.888	48	2.36
				2.948	48.5	2.36
				2.112	49	2.36
				1.813	49.5	2.36
				3.162	50	2.36
				2.545	50.5	2.36
				2.241	51	2.36
				3.058	51.5	2.36
				3.436	52	2.36
				2.533	52.5	2.36
				2.991	53	2.36
				1.678	53.5	2.36
				2.021	54	2.36
				2.414	54.5	2.36
				2.179	55	2.36
				1.746	55.5	2.36
				3.497	56	2.36
				2.381	56.5	2.36
				3.455	57	2.36
				2.472	57.5	2.36
				2.045	58	2.36
				3.381	58.5	2.36
				1.837	59	2.36
				3.162	59.5	2.36
				2.881	60	2.36
				3.467	60.5	2.36
				0.934	61	2.36
				1.746	61.5	2.36
				2.936	62	2.36
				1.465	62.5	2.36
				2.161	63	2.36
				2.429	63.5	2.36
				2.704	64	2.36
				1.398	64.5	2.36
				2.929	65	2.36
				1.496	65.5	2.36
				3.455	66	2.36
				3.021	66.5	2.36
				1.643	67	2.36
				1.544	67.5	2.36
				3.381	68	2.36
				1.331	68.5	2.36
				1.765	69	2.36
				1.563	69.5	2.36
				2.221	70	2.36
