# Supplementary material for: Plasticity of olfactory bulb inputs mediated by dendritic NMDA-spikes in rodent piriform cortex
Source: eLife. 2021 Oct 26;10:e70383. doi: 10.7554/eLife.70383 (PMC8575458; doi:10.7554/eLife.70383)
Supplement: Figure 3—figure supplement 1—source data 1. [file elife-70383-fig3-figsupp1-data1.xlsx]

## Sheet: Sheet1
Panel B								Panel D
Control EPSP				Post Induction				Control EPSP				Post Induction
Amplitude	Time	Average		Amplitude	Time	Average		Amplitude	Time	Average		Amplitude	Time	Average
1.077	0.5	0.84		0.934	28	0.88		0.714	0	0.72		0.726	19	0.69
0.391	1	0.84		0.909	28.5	0.88		0.684	0.5	0.72		0.757	19.5	0.69
0.221	1.5	0.84		0.739	29	0.88		0.501	1	0.72		0.421	20	0.69
0.635	2	0.84		0.796	29.5	0.88		0.629	1.5	0.72		0.745	20.5	0.69
2.523	2.5	0.84		1.855	30	0.88		0.671	2	0.72		0.801	21	0.69
0.818	3	0.84		1.166	30.5	0.88		0.494	2.5	0.72		0.586	21.5	0.69
0.611	3.5	0.84		0.989	31	0.88		0.781	3	0.72		0.745	22	0.69
0.732	4	0.84		0.977	31.5	0.88		0.671	3.5	0.72		0.732	22.5	0.69
0.614	4.5	0.84		1.343	32	0.88		0.562	4	0.72		0.732	23	0.69
1.051	5	0.84		1.123	32.5	0.88		0.659	4.5	0.72		0.598	23.5	0.69
1.025	5.5	0.84		0.238	33	0.88		0.726	5	0.72		0.873	24	0.69
0.592	6	0.84		1.013	33.5	0.88		1.764	5.5	0.72		0.616	24.5	0.69
0.736	6.5	0.84		0.201	34	0.88		0.494	6	0.72		0.818	25	0.69
0.555	7	0.84		0.886	34.5	0.88		0.946	6.5	0.72		0.545	25.5	0.69
0.867	7.5	0.84		0.702	35	0.88		0.812	7	0.72		0.293	26	0.69
1.306	8	0.84		1.227	35.5	0.88		0.555	7.5	0.72		0.501	26.5	0.69
2.246	8.5	0.84		0.665	36	0.88		0.818	8	0.72		0.879	27	0.69
0.464	9	0.84		0.354	36.5	0.88		0.757	8.5	0.72		1.831	27.5	0.69
0.916	9.5	0.84		1.099	37	0.88		0.629	9	0.72		0.745	28	0.69
0.531	10	0.84		0.336	37.5	0.88		0.601	9.5	0.72		0.397	28.5	0.69
1.025	10.5	0.84		0.348	38	0.88		0.623	10	0.72		1.318	29	0.69
0.481372	11	0.84		0.941	38.5	0.88		1.191	10.5	0.72		0.415	29.5	0.69
0.385	11.5	0.84		0.842	39	0.88		0.385	11	0.72		0.703	30	0.69
0.259455	12	0.84		0.333454	39.5	0.88		0.604	11.5	0.72		0.963	30.5	0.69
0.983	12.5	0.84		1.239	40	0.88		0.615	12	0.72		0.397	31	0.69
0.691	13	0.84		1.051	40.5	0.88		0.769	12.5	0.72		0.708	31.5	0.69
1.135	13.5	0.84		0.775	41	0.88		0.802	13	0.72		0.537	32	0.69
0.685794	14	0.84		0.635	41.5	0.88		0.708	13.5	0.72		0.613	32.5	0.69
				0.878	42	0.88		0.793	14	0.72		0.615	33	0.69
				0.916	42.5	0.88		0.684	14.5	0.72		0.361	33.5	0.69
				0.689	43	0.88		0.548	15	0.72		0.873	34	0.69
				0.739	43.5	0.88						0.695	34.5	0.69
				0.861	44	0.88						0.372	35	0.69
				0.221	44.5	0.88						0.458	35.5	0.69
				0.989	45	0.88
				0.836	45.5	0.88
				1.526	46	0.88
				1.855	46.5	0.88
				0.581	47	0.88
				1.312	47.5	0.88
				0.531	48	0.88
				1.331	48.5	0.88
				0.208	49	0.88
				1.389	49.5	0.88
				0.922	50	0.88
				1.221	50.5	0.88
				0.525	51	0.88
				0.641	51.5	0.88
				0.665	52	0.88
				0.262	52.5	0.88
				1.294	53	0.88
				1.991	53.5	0.88
				0.751	54	0.88
				0.696	54.5	0.88
				1.691	55	0.88
				0.823	55.5	0.88
				0.824	56	0.88
				0.537	56.5	0.88
				0.592	57	0.88
				0.372	57.5	0.88
				1.044	58	0.88
				0.421	58.5	0.88
				0.543	59	0.88
				1.519	59.5	0.88
				1.331	60	0.88
				0.629	60.5	0.88
				1.422	61	0.88
				0.531	61.5	0.88
				0.717	62	0.88
