# Supplementary material for: Plasticity of olfactory bulb inputs mediated by dendritic NMDA-spikes in rodent piriform cortex
Source: eLife. 2021 Oct 26;10:e70383. doi: 10.7554/eLife.70383 (PMC8575458; doi:10.7554/eLife.70383)
Supplement: Figure 3—source data 1. [file elife-70383-fig3-data1.xlsx]

## Sheet: Sheet1
Figure 3B (Right)				Figure 3D												Figure 3F			Figure 3G			Figure 3H
				Control EPSP				Post STDP				Post NMDA-spikes				Average EPSP of each cell			Average EPSP of each cell (APV)			Average EPSP of each cell (Sub-NMDA)
Amplitude	Stim. Intensity			Amplitude	Time	Average		Amplitude	Time	Average		Amplitude	Time	Average		Control	Post NMDA-spike		Control	Post Induction		Control	Post Induction
1.129	3			0.641	0.5	0.78		0.555	19	0.79		2.28716	38	2.42		0.93	1.5		1.35	1.46		1.69	1.66
1.279	4			0.623	1	0.78		0.477474	19.5	0.79		2.111	38.5	2.42		0.67	1.11		0.72	0.69		0.84	0.88
1.693	6			1.031	1.5	0.78		0.708	20	0.79		2.386	39	2.42		0.704	1.255		1.67	1.34		1.06	1.36
3.217	8			0.543	2	0.78		0.519	20.5	0.79		2.496	39.5	2.42		1.34	2.01		2.17	2.18		0.587	0.566
5.438	10			0.647	2.5	0.78		0.891	21	0.79		2.126	40	2.42		0.58	2.18		1.81	1.64		0.527	0.56
5.847	11			0.958	3	0.78		0.616	21.5	0.79		4.31384	40.5	2.42		0.747	1.552
20.998	13			0.739	3.5	0.78		0.781	22	0.79		3.375	41	2.42		0.79	2.42
21.632	15			0.629	4	0.78		0.469	22.5	0.79		2.631	41.5	2.42		0.81	2.53
22.583	16			1.245	4.5	0.78		0.277	23	0.79		3.223	42	2.42		0.53	1.2
				0.836	5	0.78		0.811	23.5	0.79		2.966	42.5	2.42		1.66	2.599
				0.305	5.5	0.78		0.885	24	0.79		3.241	43	2.42		0.76	1.43
				0.653	6	0.78		0.257	24.5	0.79		3.168	43.5	2.42		2.62	3.99
				0.589	6.5	0.78		1.282	25	0.79		0.586	44	2.42		1.72	4.31
				0.817	7	0.78		1.985	25.5	0.79		0.834	44.5	2.42		2.68	5.68
				0.763	7.5	0.78		0.659	26	0.79		2.991	45	2.42		2.1	3.97
				0.513	8	0.78		0.893	26.5	0.79		3.041	45.5	2.42		2.34	4.91
				0.726	8.5	0.78		1.025	27	0.79		2.204	46	2.42		2.55	5.084
				0.812	9	0.78		0.824	27.5	0.79		0.923193	46.5	2.42		2.77	6.43
				0.811	9.5	0.78		1.05	28	0.79		3.225	47	2.42		2.045	3.75
				0.629	10	0.78		0.873	28.5	0.79		1.229	47.5	2.42		3.23	6.36
				1.233	10.5	0.78		0.671	29	0.79		2.91404	48	2.42		1.92	4.91
				1.062	11	0.78		0.525	29.5	0.79		1.807	48.5	2.42		1.176	1.667
				0.698	11.5	0.78		0.581	30	0.79		3.45888	49	2.42		1.32	3.35
				1.025	12	0.78		0.543	30.5	0.79		2.637	49.5	2.42		0.632	1.28
				1.123	12.5	0.78		1.561	31	0.79		3.201	50	2.42		0.89	1.92
				0.659	13	0.78		1.099	31.5	0.79		1.025	50.5	2.42		1.168	2.8
								0.641	32	0.79		0.758	51	2.42
								0.870153	32.5	0.79		2.588	51.5	2.42
								0.848	33	0.79		2.502	52	2.42
								0.665	33.5	0.79		1.95444	52.5	2.42
								0.65609	34	0.79		2.324	53	2.42
												1.898	53.5	2.42
												2.148	54	2.42
												2.332	54.5	2.42
												3.02615	55	2.42
												3.052	55.5	2.42
												2.399	56	2.42
												1.941	56.5	2.42
												2.362	57	2.42
												3.418	57.5	2.42
												0.729	58	2.42
												3.124	58.5	2.42
												1.855	59	2.42
												1.621	59.5	2.42
												1.105	60	2.42
												3.415	60.5	2.42
												2.704	61	2.42
												3.021	61.5	2.42
												2.496	62	2.42
												2.985	62.5	2.42
												3.375	63	2.42
												2.557	63.5	2.42
												1.295	64	2.42
												0.879	64.5	2.42
												3.345	65	2.42
												3.528	65.5	2.42
												1.776	66	2.42
												2.491	66.5	2.42
												3.387	67	2.42
												3.217	67.5	2.42
												1.617	68	2.42
												2.405	68.5	2.42
