# Supplementary material for: Plasticity of olfactory bulb inputs mediated by dendritic NMDA-spikes in rodent piriform cortex
Source: eLife. 2021 Oct 26;10:e70383. doi: 10.7554/eLife.70383 (PMC8575458; doi:10.7554/eLife.70383)
Supplement: Figure 4—source data 1. [file elife-70383-fig4-data1.xlsx]

## Sheet: Sheet1
Figure 4B								Figure 4D
Control EPSP				Post NMDA-spike				Average EPSP of each cell
Amplitude	Time	Average		Amplitude	Time	Average		Control	Post Induction
2.087	0.5	1.19		1.886	20	3.44		0.93	2.212
0.608	1	1.19		1.733	20.5	3.44		1.703	3.454
1.019	1.5	1.19		1.339	21	3.44		2.96	7.65
0.869	2	1.19		1.862	21.5	3.44		1.31	2.55
0.848	2.5	1.19		1.324	22	3.44		1.19	3.44
1.283	3	1.19		3.699	22.5	3.44
0.787	3.5	1.19		4.938	23	3.44
1.239	4	1.19		4.321	23.5	3.44
1.135	4.5	1.19		4.816	24	3.44
1.532	5	1.19		2.332	24.5	3.44
1.178	5.5	1.19		5.133	25	3.44
1.196	6	1.19		4.214	25.5	3.44
0.929	6.5	1.19		4.456	26	3.44
1.251	7	1.19		3.296	26.5	3.44
1.868	7.5	1.19		3.979	27	3.44
1.788	8	1.19		1.929	27.5	3.44
1.343	8.5	1.19		4.468	28	3.44
2.145	9	1.19		3.381	28.5	3.44
0.651	9.5	1.19		2.441	29	3.44
0.781	10	1.19		2.753	29.5	3.44
1.678	10.5	1.19		2.148	30	3.44
2.075	11	1.19		1.544	30.5	3.44
1.068	11.5	1.19		2.167	31	3.44
0.801	12	1.19		3.434	31.5	3.44
1.257	12.5	1.19		2.905	32	3.44
1.215	13	1.19		5.531	32.5	3.44
0.842	13.5	1.19		3.033	33	3.44
1.117	14	1.19		1.661	33.5	3.44
0.806	14.5	1.19		3.552	34	3.44
1.424	15	1.19		4.142	34.5	3.44
0.893	15.5	1.19		2.993	35	3.44
0.873	16	1.19		1.923	35.5	3.44
0.698	16.5	1.19		3.681	36	3.44
1.066	17	1.19		2.783	36.5	3.44
				3.625	37	3.44
				4.126	37.5	3.44
				3.258	38	3.44
				3.717	38.5	3.44
				2.763	39	3.44
				4.856	39.5	3.44
				3.518	40	3.44
				3.845	40.5	3.44
				3.461	41	3.44
				7.441	41.5	3.44
				4.779	42	3.44
				5.072	42.5	3.44
				3.394	43	3.44
				5.212	43.5	3.44
				2.429	44	3.44
				4.669	44.5	3.44
				3.778	45	3.44
				3.418	45.5	3.44
				1.373	46	3.44
				3.791	46.5	3.44
				3.741	47	3.44
				2.843	47.5	3.44
				3.491	48	3.44
				4.242	48.5	3.44
				2.557	49	3.44
				3.278	49.5	3.44
				3.431	50	3.44
				3.772	50.5	3.44
				4.321	51	3.44
				4.919	51.5	3.44
				4.151	52	3.44
				4.578	52.5	3.44
				1.963	53	3.44
				2.386	53.5	3.44
				5.151	54	3.44
				3.041	54.5	3.44
				2.313	55	3.44
				5.341	55.5	3.44
				5.261	56	3.44
				2.756	56.5	3.44
				2.515	57	3.44
				3.644	57.5	3.44
				2.399	58	3.44
				1.941	58.5	3.44
				3.465	59	3.44
