# Supplementary material for: Plasticity of olfactory bulb inputs mediated by dendritic NMDA-spikes in rodent piriform cortex
Source: eLife. 2021 Oct 26;10:e70383. doi: 10.7554/eLife.70383 (PMC8575458; doi:10.7554/eLife.70383)
Supplement: Figure 5—source data 1. [file elife-70383-fig5-data1.xlsx]

## Sheet: Sheet1
Figure 5B (Inset)			Figure 5C								Figure 5D
			Control EPSP				Post NMDA-spike				Average EPSP of each cell
Amplitude	Light intensity		Amplitude	Time	Average		Amplitude	Time	Average		Control	Post NMDA-spike
2.81	10		1.563	0.5	1.706		1.631	12	4.79		1.099	2.143
9.89	15		1.508	1	1.706		1.764	12.5	4.79		1.17	2.57
10.26	20		0.238	1.5	1.706		3.705	13	4.79		2.09	3.715
12.39	25		3.109	2	1.706		5.334	13.5	4.79		1.33	2.45
36.15	30		0.729	2.5	1.706		1.318	14	4.79		1.706	4.79
37.23	35		1.342	3	1.706		8.307	14.5	4.79		2.06	4.94
			1.158	3.5	1.706		7.936	15	4.79		1.93	4.19
			1.198	4	1.706		5.438	15.5	4.79		1.94	6.27
			2.439	4.5	1.706		2.884	16	4.79		2.624	5.091
			1.514	5	1.706		5.45	16.5	4.79		4.092	7.995
			2.551	5.5	1.706		5.536	17	4.79		2.963	9.779
			2.734	6	1.706		4.797	17.5	4.79
			0.372	6.5	1.706		4.376	18	4.79
			2.234	7	1.706		4.651	18.5	4.79
			2.209	7.5	1.706		3.986	19	4.79
			2.246	8	1.706		6.067	19.5	4.79
			1.862	8.5	1.706		4.913	20	4.79
							8.776	20.5	4.79
							3.274	21	4.79
							5.432	21.5	4.79
							6.146	22	4.79
							4.999	22.5	4.79
							4.701	23	4.79
							4.956	23.5	4.79
							4.103	24	4.79
							6.226	24.5	4.79
							5.865	25	4.79
							4.987	25.5	4.79
							6.177	26	4.79
							5.017	26.5	4.79
							5.042	27	4.79
							4.517	27.5	4.79
							4.669	28	4.79
							5.145	28.5	4.79
							4.723	29	4.79
							4.901	29.5	4.79
							5.311	30	4.79
							3.497	30.5	4.79
							3.821	31	4.79
							4.736	31.5	4.79
							3.164	32	4.79
							6.251	32.5	4.79
							4.681	33	4.79
							5.353	33.5	4.79
							5.023	34	4.79
							3.699	34.5	4.79
							3.528	35	4.79
							4.071	35.5	4.79
							6.177	36	4.79
							3.174	36.5	4.79
							2.869	37	4.79
							4.254	37.5	4.79
							4.114	38	4.79
							4.907	38.5	4.79
							4.841	39	4.79
							5.859	39.5	4.79
							4.932	40	4.79
							4.279	40.5	4.79
							4.851	41	4.79
							4.279	41.5	4.79
							6.219	42	4.79
							3.394	42.5	4.79
							5.281	43	4.79
							5.804	43.5	4.79
							5.641	44	4.79
							4.523	44.5	4.79
							4.517	45	4.79
