# Supplementary material for: Plasticity of olfactory bulb inputs mediated by dendritic NMDA-spikes in rodent piriform cortex
Source: eLife. 2021 Oct 26;10:e70383. doi: 10.7554/eLife.70383 (PMC8575458; doi:10.7554/eLife.70383)
Supplement: Figure 6—source data 1. [file elife-70383-fig6-data1.xlsx]

## Sheet: Sheet1
Figure 6C									Figure 6F			Figure 6G			Figure 6H
Control EPSP				Post NMDA-spike					Average EPSP of each cell			Average EPSP of each cell			Average Ca transients of each cell
Amplitude	Time	Average		Amplitude	Time	Average			Control	Post NMDA-spike		Control	Post BAPs		NMDA-spike	EPSP+BAPs
0.977	0.5	1.02		0.909	10	1.72			1.91	2.77		1.17	1.12		1.73	0.61
0.482	1	1.02		2.344	10.5	1.72			1.69	2.47		1.05	0.93		2.21	0.61
0.562	1.5	1.02		1.111	11	1.72			1.02	1.72		1.71	1.69		1.93	0.44
1.007	2	1.02		1.911	11.5	1.72			1.79	2.53		0.98	1.04		1.96	0.71
1.521	2.5	1.02		1.984	12	1.72			1.19	1.94					1.8	0.32
0.995	3	1.02		1.196	12.5	1.72			1.88	2.75					1.12	0.38
0.879	3.5	1.02		0.873	13	1.72			1.25	1.63					0.75	0.44
1.794	4	1.02		1.424	13.5	1.72			1.59	2.27					1.15	0.51
1.129	4.5	1.02		2.142	14	1.72			1.12	1.71
1.268	5	1.02		2.124	14.5	1.72
0.604	5.5	1.02		1.841	15	1.72
0.831	6	1.02		2.736	15.5	1.72
1.322	6.5	1.02		1.308	16	1.72
0.912	7	1.02		1.593	16.5	1.72
				2.182	17	1.72
				2.289	17.5	1.72
				2.284	18	1.72
				0.585	18.5	1.72
				0.735	19	1.72
				0.568	19.5	1.72
				2.716	20	1.72
				1.46385	20.5	1.72
				1.306	21	1.72
				1.959	21.5	1.72
				1.581	22	1.72
				2.971	22.5	1.72
				1.554	23	1.72
				2.277	23.5	1.72
				0.721	24	1.72
				1.904	24.5	1.72
				1.685	25	1.72
				2.588	25.5	1.72
				1.548	26	1.72
				1.022	26.5	1.72
				1.361	27	1.72
				1.532	27.5	1.72
				1.611	28	1.72
				0.971	28.5	1.72
				0.916	29	1.72
				3.241	29.5	1.72
				1.813	30	1.72
				1.661	30.5	1.72
				2.681	31	1.72
				2.994	31.5	1.72
				2.621	32	1.72
				0.496	32.5	1.72
				1.715	33	1.72
