# Supplementary material for: Plasticity of olfactory bulb inputs mediated by dendritic NMDA-spikes in rodent piriform cortex
Source: eLife. 2021 Oct 26;10:e70383. doi: 10.7554/eLife.70383 (PMC8575458; doi:10.7554/eLife.70383)
Supplement: Figure 7—figure supplement 1—source data 1. [file elife-70383-fig7-figsupp1-data1.xlsx]

## Sheet: Sheet1
Panel B								Panel D
Control EPSP				Post Induction				Control EPSP				Post Induction
Amplitude	Time	Average		Amplitude	Time	Average		Amplitude	Time	Average		Amplitude	Time	Average
1.117	0.5	1.15		0.958	18	1.21		1.038	0	0.42		0.623	31	0.5
0.977	1	1.15		0.574	18.5	1.21		0.299	0.5	0.42		0.385	31.5	0.5
0.784	1.5	1.15		0.671	19	1.21		0.269	1	0.42		0.745	32	0.5
1.068	2	1.15		1.788	19.5	1.21		0.379	1.5	0.42		0.581	32.5	0.5
1.007	2.5	1.15		1.111	20	1.21		0.361	2	0.42		0.592	33	0.5
0.574	3	1.15		1.031	20.5	1.21		0.452	2.5	0.42		0.197	33.5	0.5
1.196	3.5	1.15		1.019	21	1.21		0.501	3	0.42		0.569	34	0.5
1.428	4	1.15		1.904	21.5	1.21		0.647	3.5	0.42		0.294	34.5	0.5
1.233	4.5	1.15		0.659	22	1.21		0.635	4	0.42		0.215	35	0.5
1.551	5	1.15		1.196	22.5	1.21		0.452	4.5	0.42		0.271	35.5	0.5
1.372	5.5	1.15		0.537	23	1.21		0.311	5	0.42		0.336	36	0.5
1.068	6	1.15		1.044	23.5	1.21		0.269	5.5	0.42		0.342	36.5	0.5
0.891	6.5	1.15		0.824	24	1.21		0.607	6	0.42		0.397	37	0.5
1.631	7	1.15		1.991	24.5	1.21		0.231	6.5	0.42		0.198	37.5	0.5
0.714	7.5	1.15		0.726	25	1.21		0.197	7	0.42		0.287	38	0.5
2.673	8	1.15		0.537	25.5	1.21		0.177	7.5	0.42		0.251	38.5	0.5
1.001	8.5	1.15		1.801	26	1.21		0.311	8	0.42		0.263	39	0.5
1.337	9	1.15		1.508	26.5	1.21		0.421	8.5	0.42		0.531	39.5	0.5
1.077	9.5	1.15		1.764	27	1.21		0.372	9	0.42		0.251	40	0.5
0.707	10	1.15		3.071	27.5	1.21		0.361	9.5	0.42		0.281	40.5	0.5
0.857	10.5	1.15		0.995	28	1.21		0.537	10	0.42		0.604	41	0.5
2.191	11	1.15		1.917	28.5	1.21		0.348	10.5	0.42		0.193	41.5	0.5
1.725	11.5	1.15		1.819	29	1.21		0.361	11	0.42		0.482	42	0.5
1.121	12	1.15		1.143	29.5	1.21		0.327	11.5	0.42		1.023	42.5	0.5
0.587	12.5	1.15		1.459	30	1.21		0.341	12	0.42		0.311	43	0.5
0.896	13	1.15		0.311	30.5	1.21		0.452	12.5	0.42		0.611	43.5	0.5
1.599	13.5	1.15		0.555	31	1.21		0.346	13	0.42		0.552	44	0.5
0.887	14	1.15		1.967	31.5	1.21		1.051	13.5	0.42		0.488	44.5	0.5
0.713	14.5	1.15		0.611	32	1.21		0.299	14	0.42		0.691	45	0.5
0.513	15	1.15		0.677	32.5	1.21		0.293	14.5	0.42		0.537	45.5	0.5
1.014	15.5	1.15		0.824	33	1.21		0.239	15	0.42		0.286	46	0.5
				0.519	33.5	1.21						0.649	46.5	0.5
				0.492	34	1.21						0.311	47	0.5
				1.801	34.5	1.21						0.596	47.5	0.5
				1.447	35	1.21						0.348	48	0.5
				1.807	35.5	1.21						0.791	48.5	0.5
				2.351	36	1.21						0.421	49	0.5
				1.594	36.5	1.21						0.748	49.5	0.5
				0.354	37	1.21						0.462	50	0.5
				1.794	37.5	1.21						0.702	50.5	0.5
				1.697	38	1.21						0.372	51	0.5
				1.971	38.5	1.21						0.659	51.5	0.5
				0.928	39	1.21						0.414	52	0.5
				0.775	39.5	1.21						0.428	52.5	0.5
				0.934	40	1.21						0.531	53	0.5
				0.818	40.5	1.21						0.803	53.5	0.5
				1.257	41	1.21						0.635	54	0.5
				1.752	41.5	1.21						0.208	54.5	0.5
				0.702	42	1.21						0.702	55	0.5
				1.101	42.5	1.21						0.591	55.5	0.5
				1.031	43	1.21						0.336	56	0.5
				1.635	43.5	1.21						0.597	56.5	0.5
				0.452	44	1.21						0.433	57	0.5
				1.385	44.5	1.21						0.498	57.5	0.5
				1.031	45	1.21						0.555	58	0.5
												0.366	58.5	0.5
												0.997	59	0.5
												0.934	59.5	0.5
												0.834	60	0.5
												0.409	60.5	0.5
												0.614	61	0.5
												0.428	61.5	0.5
												0.614	62	0.5
												0.244	62.5	0.5
												0.435	63	0.5
												1.326	63.5	0.5
												0.385	64	0.5
