# Supplementary material for: Plasticity of olfactory bulb inputs mediated by dendritic NMDA-spikes in rodent piriform cortex
Source: eLife. 2021 Oct 26;10:e70383. doi: 10.7554/eLife.70383 (PMC8575458; doi:10.7554/eLife.70383)
Supplement: Figure 7—source data 1. [file elife-70383-fig7-data1.xlsx]

## Sheet: Sheet1
Figure 7B (Bottom)				Figure 7C								Figure 7D			Figure 7E			Figure 7F
				Control EPSP				Post NMDA-spikes				Average EPSP of each cell			Average EPSP of each cell (APV)			Average EPSP of each cell (Sub-NMDA)
Area	Stim. Intensity			Amplitude	Time	Average		Amplitude	Time	Average		Control	Post NMDA-spike		Control	Post Induction		Control	Post Induction
116.182	0.4			1.129	0.5	0.66		0.861	21	0.904		0.66	0.904		1.65	1.75		0.39	0.43
506.018	0.6			0.519	1	0.66		0.671	21.5	0.904		0.64	0.789		1.59	1.34		0.42	0.5
423.319	0.8			0.708	1.5	0.66		1.654	22	0.904		1.06	1.556		2.17	2.18		0.52	0.54
432.688	1			0.507	2	0.66		0.757	22.5	0.904		0.72	0.97		0.94	1.01		1.16	1.22
1681.97	1.2			0.525	2.5	0.66		0.557	23	0.904		1.22	1.86		1.15	1.21		0.94	0.99
2442.61	1.4			0.598	3	0.66		1.202	23.5	0.904		1.35	2.02
4745.35	1.6			0.623	3.5	0.66		0.811	24	0.904
4553.06	1.8			0.885	4	0.66		1.044	24.5	0.904
				1.227	4.5	0.66		0.934	25	0.904
				0.342	5	0.66		0.922	25.5	0.904
				0.311	5.5	0.66		0.812	26	0.904
				0.482	6	0.66		1.038	26.5	0.904
				0.331	6.5	0.66		1.062	27	0.904
				0.635	7	0.66		1.157	27.5	0.904
				0.665	7.5	0.66		0.775	28	0.904
				0.476	8	0.66		0.879	28.5	0.904
				0.555	8.5	0.66		1.068	29	0.904
				0.244	9	0.66		1.041	29.5	0.904
				0.708	9.5	0.66		0.671	30	0.904
				0.616	10	0.66		1.184	30.5	0.904
				1.693	10.5	0.66		1.141	31	0.904
				0.691	11	0.66		0.989	31.5	0.904
				0.916	11.5	0.66		1.111	32	0.904
				0.598	12	0.66		1.063	32.5	0.904
				0.751	12.5	0.66		1.019	33	0.904
				0.439	13	0.66		1.017	33.5	0.904
								0.873	34	0.904
								0.934	34.5	0.904
								1.018	35	0.904
								0.879	35.5	0.904
								0.967	36	0.904
								1.202	36.5	0.904
								0.983	37	0.904
								0.799	37.5	0.904
								0.858	38	0.904
								0.773	38.5	0.904
								0.881	39	0.904
								1.004	39.5	0.904
								0.808	40	0.904
								1.051	40.5	0.904
								0.934	41	0.904
								0.909	41.5	0.904
								1.044	42	0.904
								0.777	42.5	0.904
								0.981	43	0.904
								0.963	43.5	0.904
								1.306	44	0.904
								1.031	44.5	0.904
								0.873	45	0.904
								0.928	45.5	0.904
								1.417	46	0.904
								0.854	46.5	0.904
								0.848	47	0.904
								0.916	47.5	0.904
								0.836	48	0.904
								0.787	48.5	0.904
								0.873	49	0.904
								0.824	49.5	0.904
								1.093	50	0.904
								0.623	50.5	0.904
								0.836	51	0.904
								0.842	51.5	0.904
								0.801	52	0.904
								1.068	52.5	0.904
								0.824	53	0.904
								0.765	53.5	0.904
								0.732	54	0.904
								0.807	54.5	0.904
								0.763	55	0.904
								0.941	55.5	0.904
								0.844	56	0.904
								0.702	56.5	0.904
								0.818	57	0.904
								1.084	57.5	0.904
								0.854	58	0.904
								0.793	58.5	0.904
								1.135	59	0.904
								0.635	59.5	0.904
								1.111	60	0.904
								0.916	60.5	0.904
								1.013	61	0.904
								1.019	61.5	0.904
								0.848	62	0.904
								0.667	62.5	0.904
								0.591	63	0.904
								0.806	63.5	0.904
								0.677	64	0.904
								0.916	64.5	0.904
								0.879	65	0.904
								0.704	65.5	0.904
								0.843	66	0.904
								0.761	66.5	0.904
								0.861	67	0.904
								0.872	67.5	0.904
								0.853	68	0.904
								0.659	68.5	0.904
								0.739	69	0.904
								0.763	69.5	0.904
								1.251	70	0.904
								0.655	70.5	0.904
								1.294	71	0.904
								0.745	71.5	0.904
								0.983	72	0.904
								0.769	72.5	0.904
								1.061	73	0.904
								0.708	73.5	0.904
								0.891	74	0.904
								0.897	74.5	0.904
								0.665	75	0.904
								1.213	75.5	0.904
								0.824	76	0.904
								1.038	76.5	0.904
								0.897	77	0.904
								0.961	77.5	0.904
								0.671	78	0.904
								0.932	78.5	0.904
								0.793	79	0.904
								1.151	79.5	0.904
								0.763	80	0.904
								0.525	80.5	0.904
								0.812	81	0.904
								1.007	81.5	0.904
								0.775	82	0.904
								0.989	82.5	0.904
								0.671	83	0.904
