# Supplementary material for: Plasticity of olfactory bulb inputs mediated by dendritic NMDA-spikes in rodent piriform cortex
Source: eLife journal article supplement (doi:10.7554/elife.70383), 2021-10-26

Figure 7- figure supplement 1

NMDA-spikes are necessary for LTP induction in basal dendritic synapses

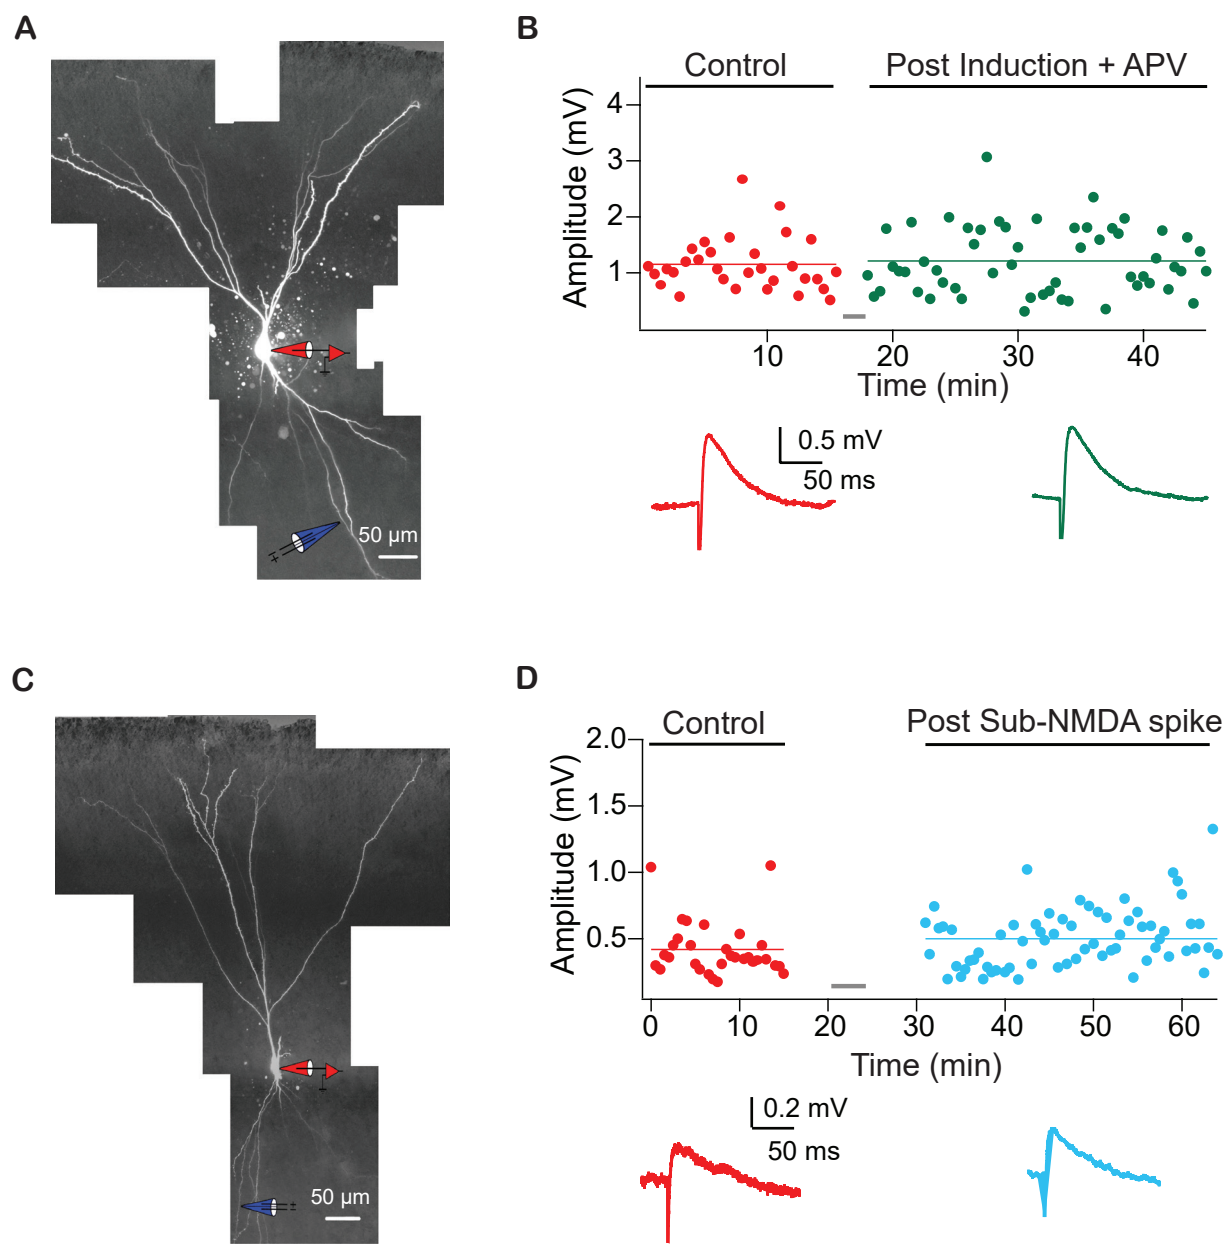

Supplement: supp [file elife-70383-supp-v1.zip]
