# Supplementary figures and images for: Plasticity of olfactory bulb inputs mediated by dendritic NMDA-spikes in rodent piriform cortex
Source: eLife journal article supplement (doi:10.7554/elife.70383), 2021-10-26

**Figure 3- figure supplement 2**

**A**

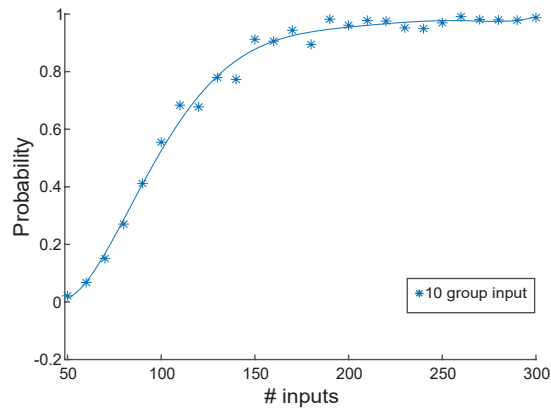

**B**

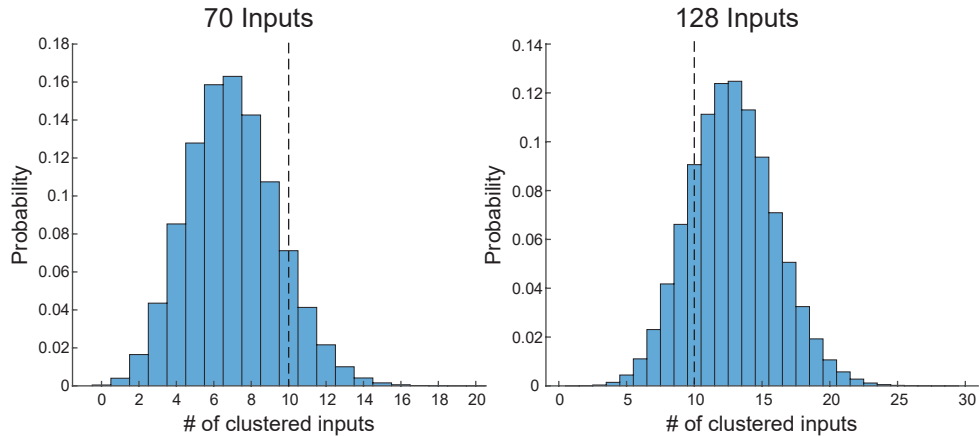

Supplement: supp [file elife-70383-supp-v1.zip]
